# Supplementary material
Source: publisher figshare collection journal article supplement (https://acs.figshare.com/ndownloader/files/3919576)
Supplement: Supplementary file 1 [file 3919576]

## **Supporting Information**

# **Fabrication of a Flexible Ultraviolet Band-Pass Filter using Surface Plasmon Metal-Polymer Nanocomposite Films for Promising Laser Applications**

Garima Kedawat <sup>\*,†</sup>, Bipin Kumar Gupta <sup>\*,‡</sup>, Pawan Kumar <sup>‡</sup>, Jaya Dwivedi <sup>‡</sup>, Arun Kumar <sup>‡</sup>

Narendra Kumar Agrawal <sup>Ψ</sup>, Sampath Satheesh Kumar <sup>⊥</sup> and Yogesh K. Vijay <sup>†</sup>

<sup>†</sup>Department of Physics, University of Rajasthan, Jaipur 302055, India

<sup>‡</sup>CSIR - National Physical Laboratory, Dr K S Krishnan Road, New Delhi, India

<sup>Ψ</sup>Department of Physics, Malaviya National Institute of Technology, Jaipur, Rajasthan-302017, India

<sup>⊥</sup> WITec GmbH, Lise-Meitner-Str. 6, D-89081 Ulm, Germany

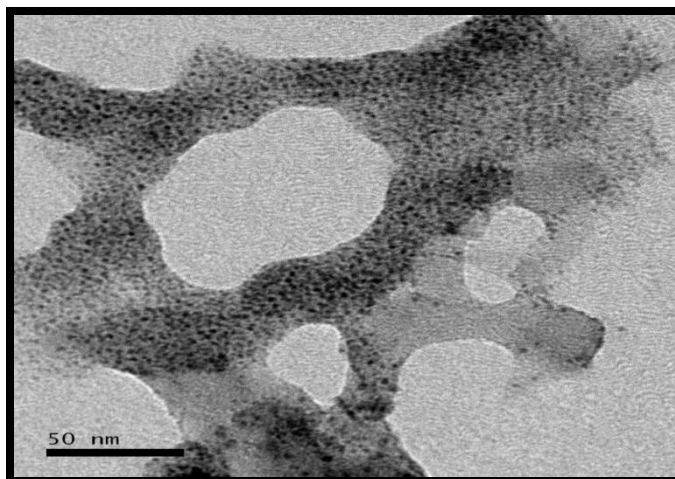

**Figure S1.** Low resolution TEM (transmission electron microscopy) micrograph exhibits the distributions of Ag nanoparticles (as dark metal contrast shining) in 5 wt% Ag/PC NC film.

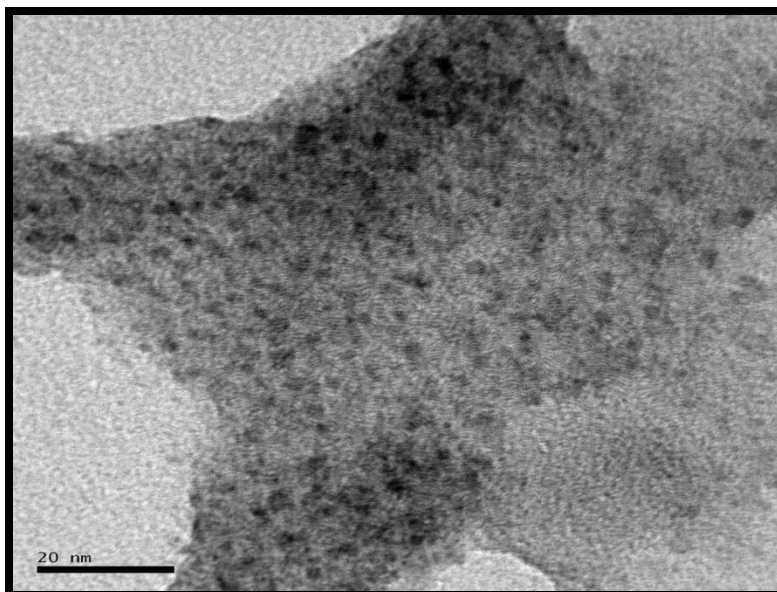

**Figure S2.** Shows the magnified view of Figure S1, the TEM micrograph exhibits the distributions of Ag nanoparticles in 5 wt% Ag/PC NC film.

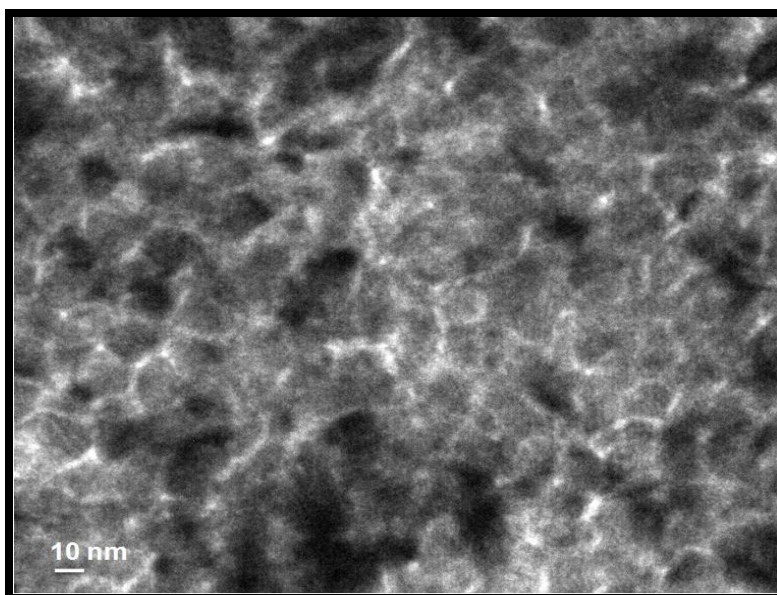

**Figure S3.** Typical HRTEM (high-resolution TEM) micrograph exhibits the distributions of Ag nanoparticles in 5 wt% Ag/PC NC film.

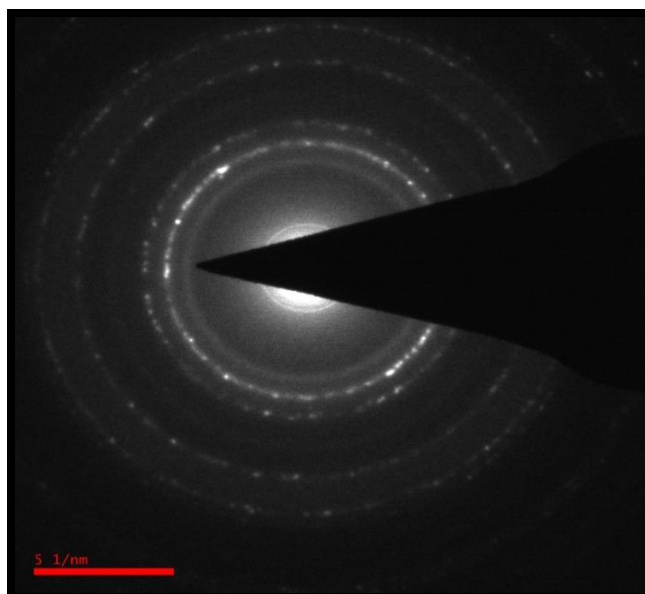

**Figure S4.** SAED pattern of 5 wt% Ag/PC NC film, it can be clearly see the evidence of Ag nanoparticles signatures in terms of sharp spot on diffraction rings.

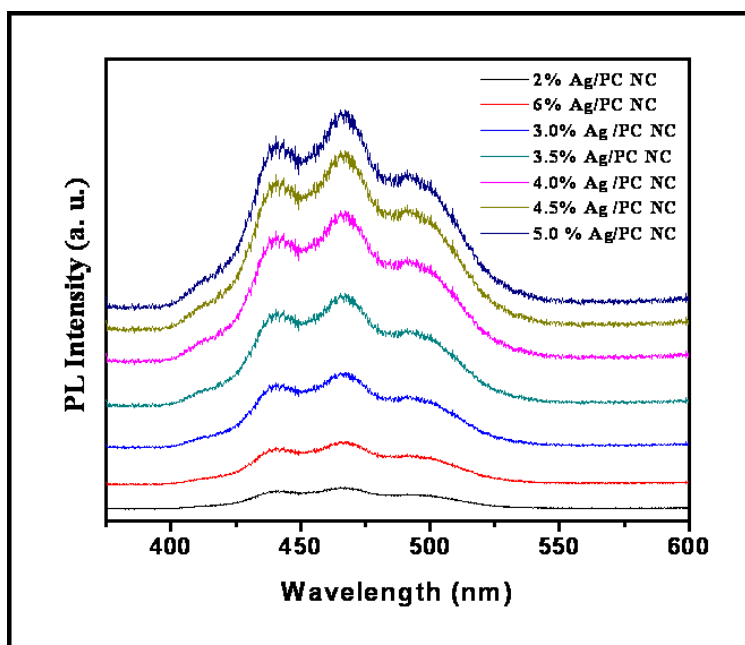

**Figure S5.** Photoluminescence spectra at excitation wavelength of 375 nm for different wt% of Ag in Ag/PC NC films.

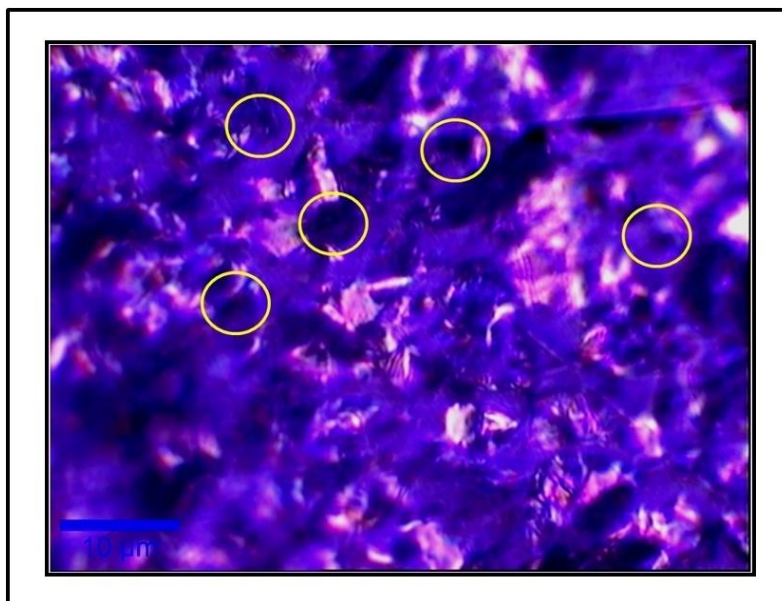

**Figure S6.** Optical micrograph image of 5 wt% Ag/PC NC film was taken using confocal\_PL mapping instrument.

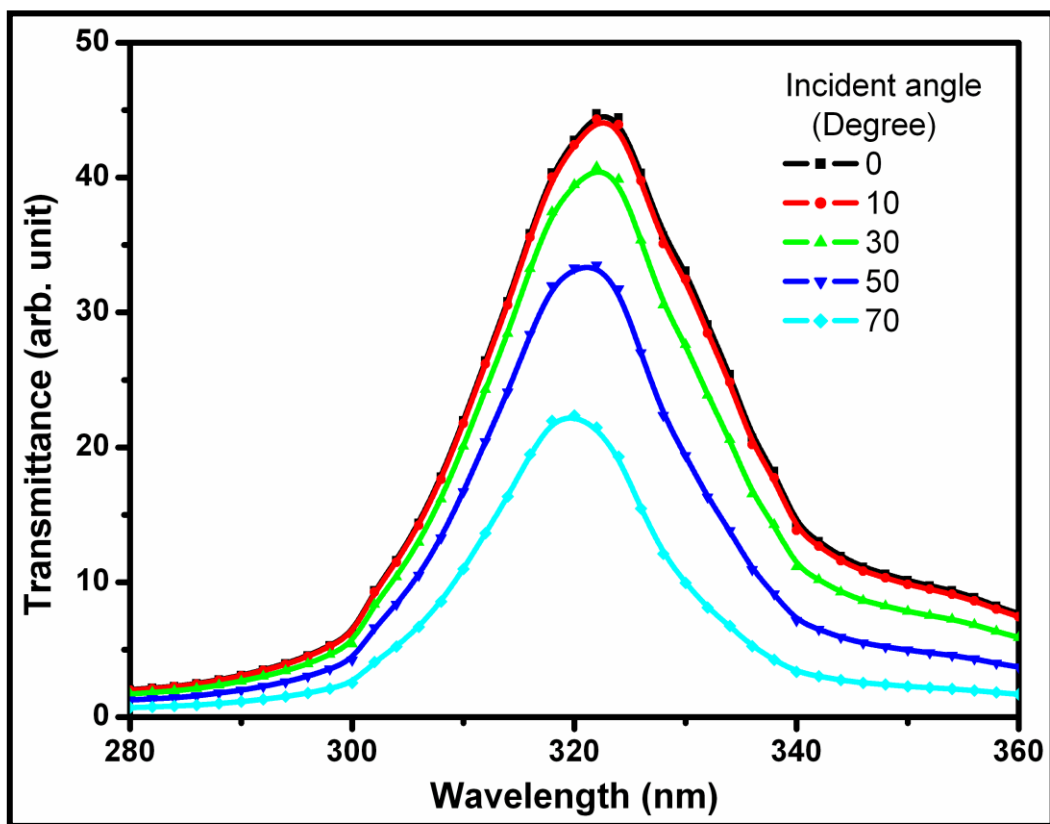

**Figure S7:** Transmittance spectra of 3 wt% Ag/PC NC film for different angle of incidence.

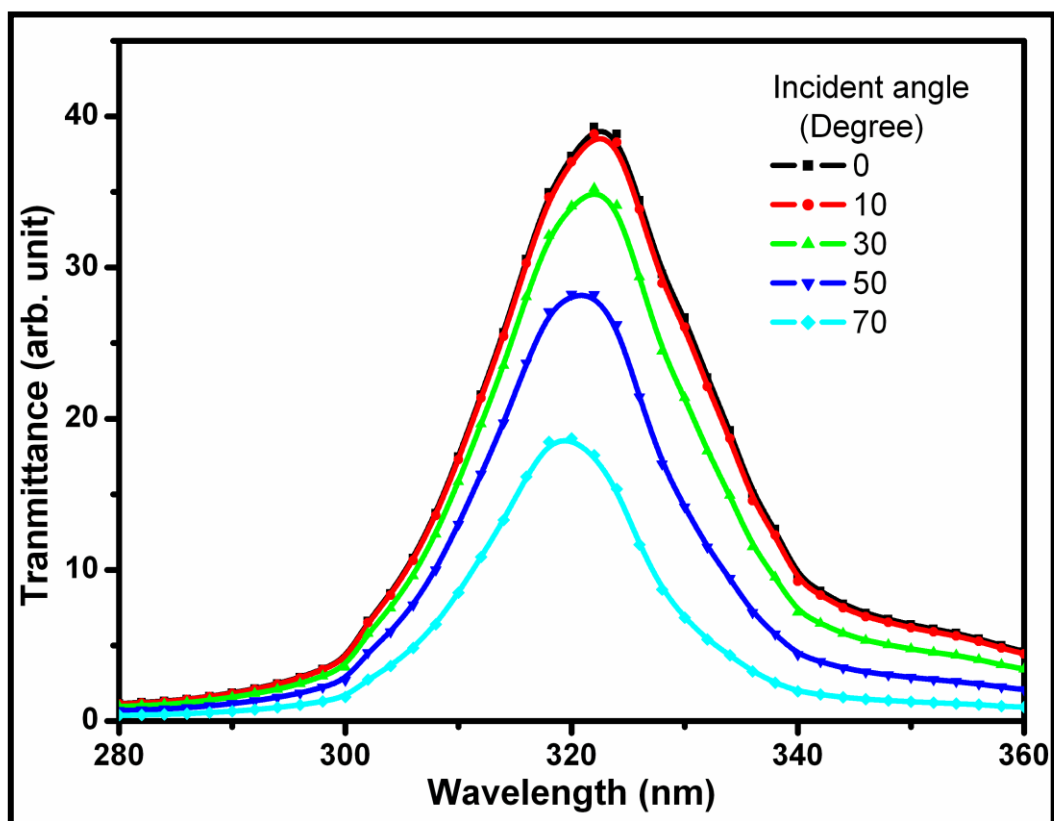

**Figure S8:** Transmittance spectra of 3.5 wt% Ag/PC NC film for different angle of incidence.

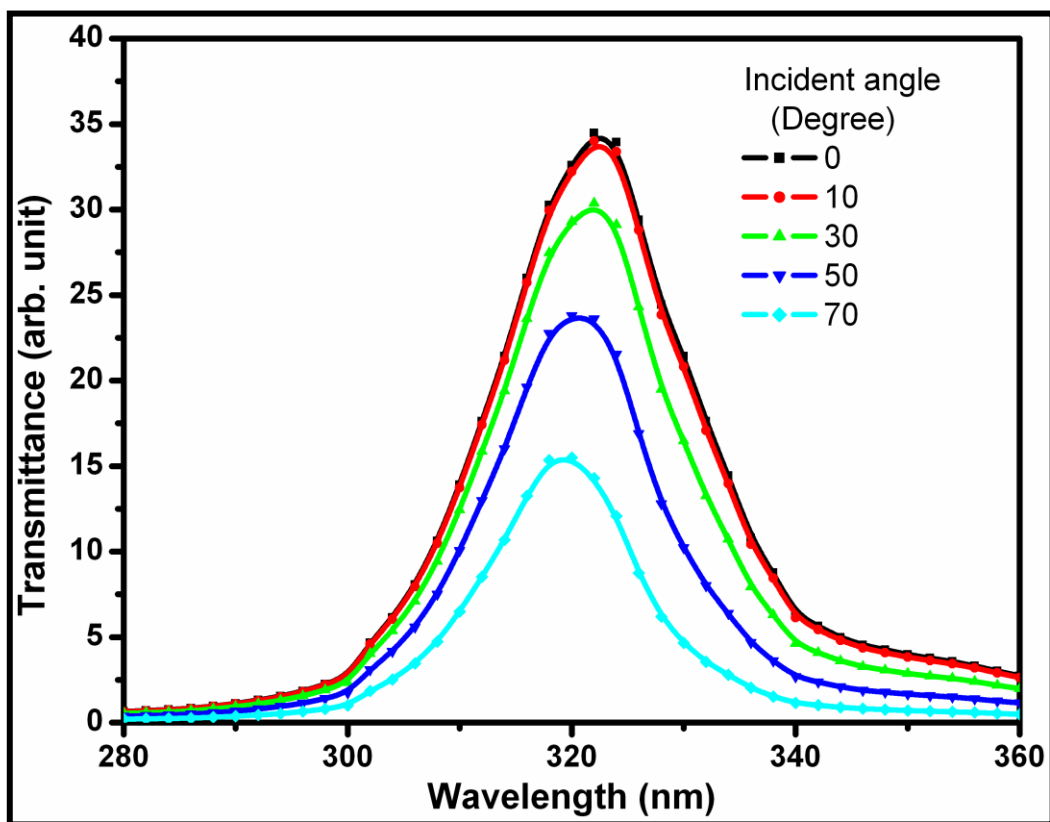

**Figure S9:** Transmittance spectra of 4 wt% Ag/PC NC film for different angle of incidence.

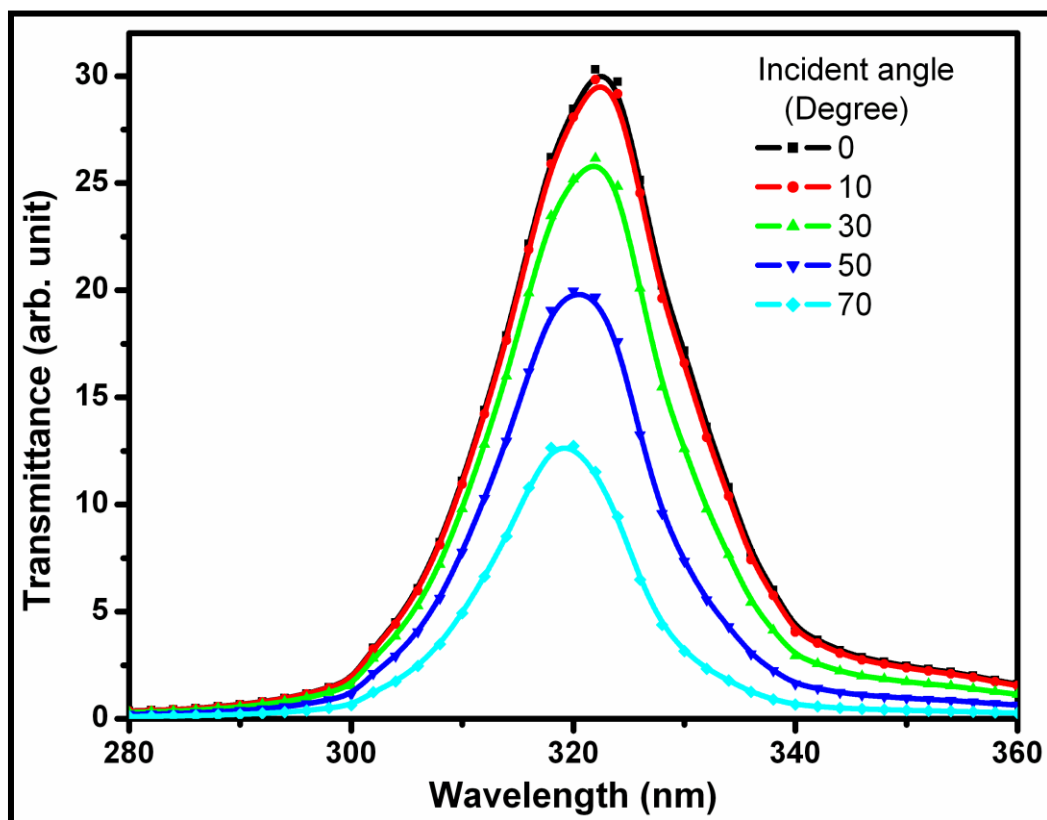

**Figure S10:** Transmittance spectra of 4.5 wt% Ag/PC NC film for different angle of incidence.
